# Supplementary material
Source: HighWire-hosted journal article supplement (https://tech.snmjournals.org/highwire/filestream/8673/field_highwire_adjunct_files/0/NMTCB_Supplemental_Data.pdf)
Supplement: NMTCB_Supplemental_Data.pdf [file NMTCB_Supplemental_Data.pdf]

**SUPPLEMENTAL TABLE 1**  
Annual Base PET Salaries by Position

| Primary Job Description                                                             | N   | Median   | Mean (SD)           | Max       | Min      | Median \$/hr*  |
|-------------------------------------------------------------------------------------|-----|----------|---------------------|-----------|----------|----------------|
| Staff Nuclear Medicine Technologist:<br>PET only – clinic/private office            | 88  | \$80,500 | \$82,162 (\$19,084) | \$177,000 | \$50,000 | <b>\$39.63</b> |
| Staff Nuclear Medicine Technologist:<br>PET only – hospital base                    | 78  | \$79,450 | \$80,985 (\$14,996) | \$134,000 | \$55,000 | <b>\$39.03</b> |
| Staff Nuclear Medicine Technologist:<br>mobile PET – hospital/clinic base           | 15  | \$79,000 | \$77,371 (\$17,540) | \$110,000 | \$48,241 | <b>\$38.38</b> |
| Staff Nuclear Medicine Technologist:<br>mobile PET – private mobile imaging service | 32  | \$68,320 | \$70,339 (\$15,080) | \$104,000 | \$35,500 | <b>\$34.69</b> |
| Combined                                                                            | 213 | \$78,811 | \$79,617 (\$17,362) | \$177,000 | \$35,500 | <b>\$38.88</b> |

\*All hourly rates were not provided by participants.

**SUPPLEMENTAL TABLE 2**  
Annual Base Cardiac Salaries by Position

| Primary Job Description                                                              | N   | Median   | Mean (SD)           | Max       | Min      | Median \$/hr*  |
|--------------------------------------------------------------------------------------|-----|----------|---------------------|-----------|----------|----------------|
| Staff Nuclear Medicine Technologist:<br>cardiac only – hospital base                 | 117 | \$75,000 | \$76,826 (\$16,529) | \$146,000 | \$49,920 | <b>\$38.50</b> |
| Staff Nuclear Medicine Technologist:<br>cardiac only – cardiac clinic/private office | 309 | \$72,000 | \$72,568 (\$16,783) | \$130,416 | \$26,000 | <b>\$36.54</b> |
| Combined                                                                             | 426 | \$72,000 | \$73,738 (\$16,802) | \$146,000 | \$26,000 | <b>\$37.00</b> |

\*All hourly rates were not provided by participants.

**SUPPLEMENTAL TABLE 3**  
Annual Entry-Level Base Salaries by Position (Graduation Years 2014–2018)

| Primary Job Description                                                                        | N   | Median   | Mean (SD)           | Max       | Min      | Median \$/hr*  |
|------------------------------------------------------------------------------------------------|-----|----------|---------------------|-----------|----------|----------------|
| Staff Nuclear Medicine Technologist<br>(all above except cardiac only or PET only)             | 250 | \$60,000 | \$60,669 (\$12,549) | \$125,000 | \$26,784 | <b>\$29.58</b> |
| PET only – Staff Nuclear Medicine Technologist<br>(hospital based, private clinic, and mobile) | 30  | \$65,600 | \$66,587 (\$9,763)  | \$81,750  | \$35,500 | <b>\$33.00</b> |
| Cardiac only – Staff Nuclear Medicine Technologist<br>(hospital-based and private clinic)      | 34  | \$58,502 | \$57,735 (\$10,588) | \$76,000  | \$26,000 | <b>\$29.99</b> |
| Combined                                                                                       | 314 | \$60,000 | \$60,917 (\$12,254) | \$125,000 | \$26,000 | <b>\$30.00</b> |

\*All hourly rates were not provided by participants.

**SUPPLEMENTAL TABLE 4**  
Annual Hospital-Based General Imaging Salaries by Regional Population

| Geographic Distribution                       | N   | Median   | Mean (SD)           | Max       | Min      | Median \$/hr*  |
|-----------------------------------------------|-----|----------|---------------------|-----------|----------|----------------|
| Major city with greater than 3 million people | 73  | \$80,000 | \$86,923 (\$24,278) | \$151,085 | \$38,000 | <b>\$41.80</b> |
| Major city with 1-3 million people            | 278 | \$76,619 | \$79,864 (\$22,676) | \$165,000 | \$31,000 | <b>\$37.70</b> |
| Suburban/small city                           | 370 | \$72,000 | \$73,293 (\$16,973) | \$156,000 | \$36,000 | <b>\$35.98</b> |
| Urban                                         | 443 | \$70,000 | \$72,775 (\$19,117) | \$180,000 | \$26,784 | <b>\$35.25</b> |
| Rural                                         | 179 | \$64,480 | \$67,428 (\$14,464) | \$118,000 | \$40,358 | <b>\$33.00</b> |

\*All hourly rates were not provided by participants.

**SUPPLEMENTAL TABLE 5**  
Annual Hospital-Based General Imaging Salaries by State (National Median=\$71,254)

|                | N     | Median    | Mean (SD)            | Max       | Min      | Median \$/hr* |
|----------------|-------|-----------|----------------------|-----------|----------|---------------|
| Alaska         | 4     | \$110,000 | \$107,125 (\$17,264) | \$125,000 | \$83,500 | \$52.76       |
| Alabama        | 38    | \$60,000  | \$60,088 (\$8,268)   | \$77,800  | \$45,000 | \$30.00       |
| Arkansas       | 13    | \$61,630  | \$62,934 (\$7,380)   | \$76,648  | \$52,000 | \$29.80       |
| Arizona        | 28    | \$79,000  | \$81,798 (\$17,353)  | \$150,000 | \$50,000 | \$39.76       |
| California     | 79    | \$117,000 | \$114,438 (\$27,399) | \$180,000 | \$50,000 | \$59.04       |
| Colorado       | 26    | \$80,000  | \$80,270 (\$11,229)  | \$103,000 | \$60,000 | \$39.50       |
| Connecticut    | 13    | \$89,000  | \$84,333 (\$17,161)  | \$104,728 | \$50,000 | \$42.60       |
| Delaware       | 4     | \$90,604  | \$87,302 (\$8,293)   | \$93,000  | \$75,000 | \$44.43       |
| Florida        | 74    | \$70,000  | \$70,389 (\$12,801)  | \$108,000 | \$40,000 | \$35.03       |
| Georgia        | 33    | \$62,000  | \$63,014 (\$9,065)   | \$88,628  | \$46,991 | \$31.27       |
| Hawaii         | 2     | \$105,400 | \$105,400 (\$9,334)  | \$112,000 | \$98,800 | \$52.01       |
| Iowa           | 9     | \$68,000  | \$71,336 (\$10,004)  | \$91,000  | \$56,400 | \$37.50       |
| Idaho          | 11    | \$78,000  | \$81,065 (\$14,716)  | \$112,320 | \$59,923 | \$38.00       |
| Illinois       | 62    | \$70,000  | \$71,492 (\$15,862)  | \$112,300 | \$39,000 | \$35.70       |
| Indiana        | 56    | \$69,160  | \$71,359 (\$15,505)  | \$130,000 | \$43,700 | \$34.18       |
| Kansas         | 16    | \$65,000  | \$66,121 (\$9,582)   | \$87,000  | \$52,000 | \$32.53       |
| Kentucky       | 25    | \$60,000  | \$61,361 (\$10,820)  | \$85,000  | \$41,000 | \$30.36       |
| Louisiana      | 26    | \$76,803  | \$80,060 (\$26,469)  | \$156,000 | \$46,560 | \$37.25       |
| Massachusetts  | 25    | \$79,000  | \$81,465 (\$19,223)  | \$130,000 | \$52,000 | \$38.35       |
| Maryland       | 26    | \$68,320  | \$73,156 (\$12,273)  | \$102,000 | \$60,000 | \$34.33       |
| Maine          | 6     | \$66,550  | \$68,415 (\$10,673)  | \$85,000  | \$55,120 | \$32.62       |
| Michigan       | 64    | \$70,000  | \$69,615 (\$8,370)   | \$85,000  | \$52,000 | \$35.00       |
| Minnesota      | 20    | \$84,260  | \$82,224 (\$13,986)  | \$101,000 | \$47,074 | \$40.50       |
| Missouri       | 31    | \$64,000  | \$67,919 (\$14,530)  | \$104,500 | \$45,000 | \$34.50       |
| Mississippi    | 13    | \$64,480  | \$64,327 (\$10,510)  | \$81,868  | \$50,000 | \$31.50       |
| Montana        | 7     | \$69,190  | \$68,415 (\$11,941)  | \$82,000  | \$50,000 | \$39.00       |
| North Carolina | 40    | \$60,000  | \$61,207 (\$14,458)  | \$90,000  | \$36,000 | \$31.90       |
| North Dakota   | 6     | \$63,700  | \$63,514 (\$4,418)   | \$70,000  | \$57,782 | \$30.85       |
| Nebraska       | 12    | \$72,500  | \$71,113 (\$10,615)  | \$87,500  | \$48,200 | \$37.00       |
| New Hampshire  | 7     | \$83,000  | \$78,023 (\$11,220)  | \$87,360  | \$57,000 | \$39.95       |
| New Jersey     | 20    | \$83,450  | \$86,832 (\$22,052)  | \$120,900 | \$45,000 | \$41.75       |
| New Mexico     | 11    | \$78,000  | \$73,597 (\$12,906)  | \$87,360  | \$45,000 | \$39.62       |
| Nevada         | 5     | \$83,200  | \$79,840 (\$22,848)  | \$102,000 | \$47,000 | \$40.00       |
| New York       | 59    | \$78,000  | \$79,990 (\$12,879)  | \$113,000 | \$55,000 | \$40.20       |
| Ohio           | 65    | \$67,246  | \$67,502 (\$14,588)  | \$115,000 | \$40,000 | \$34.53       |
| Oklahoma       | 15    | \$70,116  | \$71,450 (\$10,634)  | \$87,400  | \$55,000 | \$34.00       |
| Oregon         | 13    | \$93,000  | \$89,694 (\$12,086)  | \$106,800 | \$60,000 | \$45.00       |
| Pennsylvania   | 68    | \$70,000  | \$71,444 (\$15,074)  | \$110,000 | \$42,000 | \$34.06       |
| Rhode Island   | 4     | \$77,282  | \$80,303 (\$6,940)   | \$90,646  | \$76,000 | \$39.23       |
| South Carolina | 19    | \$61,000  | \$62,100 (\$10,667)  | \$84,000  | \$47,588 | \$30.45       |
| South Dakota   | 7     | \$66,100  | \$66,477 (\$7,255)   | \$79,000  | \$55,000 | \$32.30       |
| Tennessee      | 44    | \$60,000  | \$61,081 (\$8,990)   | \$84,000  | \$41,000 | \$30.56       |
| Texas          | 83    | \$74,048  | \$74,546 (\$14,219)  | \$102,000 | \$47,000 | \$35.76       |
| Utah           | 9     | \$73,000  | \$73,911 (\$13,667)  | \$91,000  | \$48,500 | \$35.40       |
| Virginia       | 37    | \$66,000  | \$67,607 (\$14,849)  | \$100,000 | \$40,000 | \$32.55       |
| Vermont        | 1     | \$70,000  | -                    | -         | -        | \$33.40       |
| Washington     | 30    | \$93,643  | \$93,177 (\$19,771)  | \$141,632 | \$65,000 | \$46.21       |
| Wisconsin      | 54    | \$74,850  | \$75,794 (\$14,005)  | \$104,416 | \$45,000 | \$38.75       |
| West Virginia  | 9     | \$65,000  | \$66,949 (\$8,792)   | \$77,550  | \$55,000 | \$33.00       |
| Wyoming        | 2     | \$67,910  | \$67,910 (\$9,563)   | \$74,672  | \$61,148 | \$32.69       |
| Other          | 14    | \$39,179  | \$48,066 (\$17,154)  | \$78,000  | \$26,784 | \$20.51       |
| Combined       | 1,356 | \$71,254  | \$74,420 (\$19,634)  | \$180,000 | \$26,784 | \$36.00       |

\*All hourly rates were not provided by participants.

**SUPPLEMENTAL TABLE 6**  
Annual Hospital-Based General Imaging Salaries by U.S. Region

| U.S. Region/States                                   | N   | Median    | Mean (SD)            | Max       | Min      | Median \$/hr*  |
|------------------------------------------------------|-----|-----------|----------------------|-----------|----------|----------------|
| The Pacific: AK, CA, HI, OR, WA                      | 128 | \$104,500 | \$106,572 (\$26,114) | \$180,000 | \$50,000 | <b>\$52.76</b> |
| The North-East: CT, MA, ME, NY, RI, VT, NH           | 115 | \$78,000  | \$80,002 (\$14,726)  | \$130,000 | \$50,000 | <b>\$39.69</b> |
| The Mid-Atlantic: DE, MD, NJ, PA, VA, WV             | 164 | \$70,000  | \$72,867 (\$16,281)  | \$120,900 | \$40,000 | <b>\$34.93</b> |
| The Mountain: AZ, CO, ID, MT, NM, NV, UT, WY         | 99  | \$78,000  | \$78,631 (\$14,811)  | \$150,000 | \$45,000 | <b>\$39.00</b> |
| The West Central Mid-West: IA, KS, MN, MO, ND, SD NE | 101 | \$67,941  | \$70,789 (\$13,248)  | \$104,500 | \$45,000 | <b>\$35.32</b> |
| The Central South-West: AR, LA, OK, TX               | 137 | \$72,700  | \$74,152 (\$16,934)  | \$156,000 | \$46,560 | <b>\$35.33</b> |
| The East Central Mid-West: IL, IN, OH, WI, MI        | 301 | \$70,000  | \$70,978 (\$14,045)  | \$130,000 | \$39,000 | <b>\$35.18</b> |
| The South: AL, FL, GA, KY, MS, NC, SC, TN            | 286 | \$63,034  | \$63,838 (\$11,771)  | \$108,000 | \$36,000 | <b>\$31.96</b> |

\*All hourly rates were not provided by participants.

**SUPPLEMENTAL TABLE 7**  
Median Annual Base Salaries by Gender and Ethnicity

| Self-Reported Ethnicity and Gender      | Male             | Female           | Gender not Identified | Combined         |
|-----------------------------------------|------------------|------------------|-----------------------|------------------|
| African American or Black               | \$81,900 (41)    | \$74,500 (60)    | \$57,000 (3)          | \$76,000 (104)   |
| American Indian or Alaskan Native       | \$100,000 (7)    | \$73,180 (8)     | \$79,040 (1)          | \$83,020 (16)    |
| Asian or Pacific Islander               | \$91,000 (64)    | \$76,725 (50)    | \$100,000 (4)         | \$83,700 (118)   |
| Latino or Hispanic                      | \$80,561 (72)    | \$72,800 (91)    | \$77,000 (1)          | \$76,000 (164)   |
| Mixed                                   | \$91,000 (26)    | \$70,161 (38)    | \$98,150 (2)          | \$76,500 (66)    |
| White                                   | \$80,000 (974)   | \$73,000 (1,506) | \$82,500 (35)         | \$76,000 (2,515) |
| Prefer not to answer or item left blank | \$81,660 (65)    | \$78,000 (49)    | \$79,000 (14)         | \$79,603 (128)   |
| Combined                                | \$80,184 (1,249) | \$73,300 (1,802) | \$79,020 (60)         | \$76,538 (3,111) |

Total number, n, is shown in parentheses.

**SUPPLEMENTAL TABLE 8**  
Annual Hospital-Based General Imaging Salaries by Gender

| Gender   | N     | Median   | Mean (SD)           | Max       | Min      |
|----------|-------|----------|---------------------|-----------|----------|
| Male     | 522   | \$75,000 | \$77,891 (\$21,560) | \$180,000 | \$26,784 |
| Female   | 809   | \$70,000 | \$72,138 (\$18,074) | \$160,000 | \$34,560 |
| Combined | 1,331 | \$71,000 | \$74,394 (\$19,709) | \$180,000 | \$26,784 |

**SUPPLEMENTAL TABLE 9**  
Annual Hospital-Based General Imaging Salaries by Ethnic Background (National Median = \$71,254)

| Reported Ethnicity                | N            | Median          | Mean (SD)                  | Max              | Min             |
|-----------------------------------|--------------|-----------------|----------------------------|------------------|-----------------|
| African American or Black         | 42           | \$70,000        | \$69,022 (\$13,970)        | \$102,000        | \$38,000        |
| American Indian or Alaskan Native | 8            | \$73,840        | \$90,103 (\$37,994)        | \$156,000        | \$54,000        |
| Asian or Pacific Islander         | 53           | \$78,000        | \$88,629 (\$31,817)        | \$180,000        | \$40,000        |
| Latino or Hispanic                | 69           | \$74,048        | \$74,735 (\$24,668)        | \$142,825        | \$31,000        |
| Mixed                             | 34           | \$70,161        | \$76,777 (\$19,625)        | \$135,699        | \$40,000        |
| White                             | 1,106        | \$70,995        | \$73,698 (\$18,254)        | \$160,000        | \$26,784        |
| <b>Total</b>                      | <b>1,312</b> | <b>\$71,254</b> | <b>\$78,827 (\$24,388)</b> | <b>\$180,000</b> | <b>\$31,000</b> |

**SUPPLEMENTAL TABLE 10**  
Median Annual Base Salaries by Region and Ethnicity

| Ethnicity                         | The Pacific    | The North East | The Mid-Atlantic | The Mountain  | The West Central Mid-West | The Central South West | The East Central Mid-West | The South      |
|-----------------------------------|----------------|----------------|------------------|---------------|---------------------------|------------------------|---------------------------|----------------|
| African American or Black         | -              | \$76,000 (3)   | \$70,000 (7)     | -             | \$84,300 (1)              | \$76,900 (8)           | \$70,000 (5)              | \$68,000 (15)  |
| American Indian or Alaskan Native | \$112,000 (3)  | -              | \$56,000 (1)     | -             | \$65,000 (1)              | \$156,000 (1)          | \$66,520 (2)              | -              |
| Asian or Pacific Islander         | \$120,000 (16) | \$91,500 (2)   | \$90,000 (7)     | -             | -                         | \$73,115 (11)          | \$64,000 (3)              | \$64,740 (12)  |
| Latino or Hispanic                | \$108,750 (14) | \$79,000 (6)   | \$92,000 (3)     | \$70,000 (3)  | \$63,000 (1)              | \$71,344 (16)          | \$72,800 (3)              | \$67,500 (16)  |
| Mixed                             | \$91,520 (5)   | \$72,961 (4)   | \$74, 920 (6)    | \$71,100 (2)  | \$67,000 (1)              | \$93,000 (3)           | \$69,500 (6)              | \$64,238 (6)   |
| White                             | \$101,320 (89) | \$78,000 (97)  | \$68,566 (134)   | \$77,000 (87) | \$68,000 (93)             | \$70,000 (96)          | \$70,000 (271)            | \$61,680 (230) |

Total number, n, is shown in parentheses.

**SUPPLEMENTAL TABLE 11**  
Annual Base Salaries by Years of Experience in Hospital-Based General Imaging

| Years of Experience     | N   | Median   | Mean (SD)           | Max       | Min      |
|-------------------------|-----|----------|---------------------|-----------|----------|
| Entry Level (<5 years)  | 267 | \$60,000 | \$61,182 (\$13,055) | \$125,000 | \$26,784 |
| ≥5 years and <10 years  | 206 | \$66,405 | \$68,320 (\$14,595) | \$124,000 | \$37,382 |
| ≥10 years and <15 years | 268 | \$72,350 | \$75,528 (\$19,517) | \$180,000 | \$40,000 |
| ≥15 years and <20 years | 185 | \$75,500 | \$79,250 (\$21,311) | \$160,000 | \$6,700  |
| ≥20 years and <25 years | 127 | \$80,000 | \$81,888 (\$17,492) | \$165,000 | \$45,000 |
| ≥25 years and <30 years | 109 | \$80,500 | \$81,957 (\$19,106) | \$151,840 | \$45,000 |
| ≥30 years and <35 years | 91  | \$84,300 | \$85,538 (\$21,384) | \$150,000 | \$40,358 |
| ≥35 years and <40 years | 65  | \$80,000 | \$82,332 (\$21,494) | \$151,085 | \$41,000 |
| ≥40 years               | 38  | \$79,250 | \$82,445 (\$15,801) | \$132,080 | \$60,000 |

**SUPPLEMENTAL TABLE 12**  
Annual Base Salaries by Highest Degree Obtained (All Full-Time NMT Job Descriptions)

| Highest Degree Obtained    | N    | Median    | Mean (SD)           | Max       | Min      | Median Age (n)* | Median Grad Year (n)* |
|----------------------------|------|-----------|---------------------|-----------|----------|-----------------|-----------------------|
| High School                | 12   | \$77,500  | \$75,938 (\$15,497) | \$96,000  | \$43,000 | 59 (11)         | 2005 (3)              |
| Certificate of Completion  | 201  | \$80,000  | \$82,108 (\$21,265) | \$152,000 | \$45,000 | 55 (200)        | 1994 (113)            |
| Associate's Degree         | 872  | \$74,000  | \$76,609 (\$20,951) | \$280,000 | \$26,000 | 47 (866)        | 2004 (645)            |
| Baccalaureate Degree       | 1681 | \$76,000  | \$78,815 (\$21,961) | \$250,000 | \$26,784 | 42 (1,671)      | 2005 (1,437)          |
| Master's Degree            | 309  | \$87,000  | \$90,302 (\$26,931) | \$190,000 | \$23,011 | 46 (306)        | 1999 (262)            |
| Doctorate Degree or higher | 17   | \$101,000 | \$99,075 (\$34,266) | \$192,000 | \$31,000 | 56 (17)         | 1990 (17)             |

\*All participants did not provide this information.

**SUPPLEMENTAL TABLE 13**

Annual Base Salaries by Highest Degree Obtained (Hospital-Based General Imaging)

| Highest Degree Obtained   | N   | Median   | Mean (SD)           | Max       | Min      | Median Age (n)* | Median Grad Year (n)* |
|---------------------------|-----|----------|---------------------|-----------|----------|-----------------|-----------------------|
| High School               | 3   | \$77,000 | \$79,619 (\$7,768)  | \$88,358  | \$73,500 | 55 (2)          | 1969 (1)              |
| Certificate of Completion | 84  | \$72,600 | \$76,299 (\$18,824) | \$140,000 | \$45,000 | 53 (83)         | 1998 (43)             |
| Associate's Degree        | 402 | \$70,000 | \$72,790 (\$18,612) | \$160,000 | \$36,000 | 45 (396)        | 2006 (301)            |
| Baccalaureate Degree      | 779 | \$71,635 | \$74,456 (\$19,685) | \$165,000 | \$26,784 | 39 (774)        | 2007 (678)            |
| Master's Degree           | 79  | \$78,000 | \$80,812 (\$23,697) | \$180,000 | \$40,000 | 49 (77)         | 2003 (68)             |
| Doctorate Degree          | 2   | \$45,500 | \$45,500 (\$20,506) | \$60,000  | \$31,000 | 47 (2)          | 2017 (2)              |

**SUPPLEMENTAL TABLE 14**

Annual Base Salaries by Type of NMT Program Graduated (2014–2018 Graduates Only)

| Program Type                            | N   | Median   | Mean (SD)           | Max       | Min      |
|-----------------------------------------|-----|----------|---------------------|-----------|----------|
| Hospital or medical center              | 30  | \$61,500 | \$65,019 (\$13,769) | \$115,430 | \$47,000 |
| Military-based                          | 3   | \$55,000 | \$62,533 (\$19,428) | \$84,600  | \$48,000 |
| Community College or Tech School        | 104 | \$60,364 | \$61,578 (\$12,072) | \$95,513  | \$26,000 |
| Four year college or university         | 171 | \$60,000 | \$60,533 (\$11,774) | \$107,120 | \$31,000 |
| University-associated teaching hospital | 30  | \$57,940 | \$58,124 (\$18,074) | \$125,000 | \$26,784 |
